# Supplementary material
Source: HighWire-hosted journal article supplement (https://bmjopen.bmj.com/content/12/9/e064403)
Supplement: inline-supplementary-material-1 [file inline-supplementary-material-1.pdf]

**Supplemental Table 1** Summary of clinical parameters

| Parameters                                                      | Base case value | PSA          |            | Reference |
|-----------------------------------------------------------------|-----------------|--------------|------------|-----------|
|                                                                 |                 | Distribution | Alpha-Beta |           |
| <i>Initial probabilities</i>                                    |                 |              |            |           |
| mRS 0-2 after Alteplase and EVT                                 | 0.46            | Dirichlet    | 244-281    | 4         |
| mRS 3-5 after Alteplase and EVT                                 | 0.40            | Dirichlet    | 209-316    | 4         |
| mRS 6 after Alteplase and EVT                                   | 0.14            | Dirichlet    | 72-453     | 4         |
| mRS 0-2 after Alteplase                                         | 0.27            | Dirichlet    | 153-412    | 4         |
| mRS 3-5 after Alteplase                                         | 0.55            | Dirichlet    | 308-257    | 4         |
| mRS 6 after Alteplase                                           | 0.18            | Dirichlet    | 104-461    | 4         |
| mRS 0-2 after EVT                                               | 0.44            | Dirichlet    | 47-61      | 4         |
| mRS 3-5 after EVT                                               | 0.33            | Dirichlet    | 36-72      | 4         |
| mRS 6 after EVT                                                 | 0.23            | Dirichlet    | 25-83      | 4         |
| mRS 0-2 after supportive care                                   | 0.22            | Dirichlet    | 18-62      | 4         |
| mRS 3-5 after supportive care                                   | 0.55            | Dirichlet    | 44-36      | 4         |
| mRS 6 after supportive care                                     | 0.23            | Dirichlet    | 18-62      | 4         |
| <i>Transition probabilities (cycle length is 3 months)</i>      |                 |              |            |           |
| Movement from 'Independent' to ..., up to end of the first year |                 |              |            |           |
| Independent                                                     | 0.955           | Dirichlet    | 1337-63    | 13, 14    |
| Disability                                                      | 0.024           | Dirichlet    | 34-1366    | 13, 14    |
| Recurrent stroke                                                | 0.013           | Dirichlet    | 18-1382    | 13, 14    |
| Dead                                                            | 0.008           | Dirichlet    | 11-1389    | 13, 14    |

| Parameters                                                           | Base case value | PSA          |            | Reference     |
|----------------------------------------------------------------------|-----------------|--------------|------------|---------------|
|                                                                      |                 | Distribution | Alpha-Beta |               |
| Movement from 'Disability' to ..., up to end of the first year       |                 |              |            |               |
| Disability                                                           | 0.919           | Dirichlet    | 1287-113   | 13, 14        |
| Independent                                                          | 0.029           | Dirichlet    | 41-1359    | 13, 14        |
| Recurrent stroke                                                     | 0.013           | Dirichlet    | 18-1382    | 13, 14        |
| Dead                                                                 | 0.039           | Dirichlet    | 55-1345    | 13, 14        |
| Movement from 'Recurrent stroke' to ..., up to end of the first year |                 |              |            |               |
| mRS 0-2 after Alteplase and EVT                                      | 0.46            | Dirichlet    | 460-540    | 14            |
| mRS 3-5 after Alteplase and EVT                                      | 0.39            | Dirichlet    | 390-610    | 14            |
| mRS 6 after Alteplase and EVT                                        | 0.15            | Dirichlet    | 150-850    | 14            |
| mRS 0-2 after Alteplase                                              | 0.26            | Dirichlet    | 260-740    | 14            |
| mRS 3-5 after Alteplase                                              | 0.55            | Dirichlet    | 550-450    | 14            |
| mRS 6 after Alteplase                                                | 0.19            | Dirichlet    | 190-810    | <sup>14</sup> |
| Movement from 'Independent' to ..., after the first year             |                 |              |            |               |
| Independent                                                          | 0.979           | Dirichlet    | 1371-28    | 13, 14        |
| Disability                                                           | 0               | Dirichlet    | 17-1382    | 13, 14        |
| Recurrent stroke                                                     | 0.013           | Dirichlet    | 11-1388    | 13, 14        |
| Dead                                                                 | 0.008           | Dirichlet    | 11-1388    | 13, 14        |
| Movement from 'Disability' to ..., after the first year              |                 |              |            |               |

| Parameters                                                                                       | Base case value | PSA          |            | Reference |
|--------------------------------------------------------------------------------------------------|-----------------|--------------|------------|-----------|
|                                                                                                  |                 | Distribution | Alpha-Beta |           |
| Disability                                                                                       | 0.948           | Dirichlet    | 1327-72    | 13, 14    |
| Independent                                                                                      | 0               | Dirichlet    | 17-1382    | 13, 14    |
| Recurrent stroke                                                                                 | 0.013           | Dirichlet    | 54-1345    | 13, 14    |
| Dead                                                                                             | 0.039           | Dirichlet    | 55-1345    | 13, 14    |
| Movement from 'Recurrent stroke' to ..., after the first year                                    |                 |              |            |           |
| mRS 0-2 after Alteplase and EVT                                                                  | 0.867           | Dirichlet    | 867-132    | 14, 15    |
| mRS 3-5 after Alteplase and EVT                                                                  | 0.104           | Dirichlet    | 103-896    | 14, 15    |
| mRS 6 after Alteplase and EVT                                                                    | 0.029           | Dirichlet    | 28-971     | 14, 15    |
| mRS 0-2 after Alteplase                                                                          | 0.834           | Dirichlet    | 834-165    | 14, 15    |
| mRS 3-5 after Alteplase                                                                          | 0.137           | Dirichlet    | 136-863    | 14, 15    |
| mRS 6 after Alteplase                                                                            | 0.029           | Dirichlet    | 28-971     | 14, 15    |
| EVT, endovascular treatment; mRS, modified Rankin Scale; PSA, probabilistic sensitivity analysis |                 |              |            |           |

**Supplemental Table 2** Summary of cost and utility data

|                                                        | Base case value (THB) | Univariate sensitivity analysis | PSA          |       | Reference                |
|--------------------------------------------------------|-----------------------|---------------------------------|--------------|-------|--------------------------|
|                                                        |                       |                                 | Distribution | SE    |                          |
| Alteplase                                              | 50,000                | 40,000-60,000                   | NA           | NA    | NHSO                     |
| Thrombectomy devices*                                  | 73,800                | 59,100-114,300                  | NA           | NA    | Manufacturers            |
| <b><i>Treatment costs (3 months cost)</i></b>          |                       |                                 |              |       |                          |
| Acute ischemic stroke (per admission)                  | 97,400                | 80,000-114,800                  | Gamma        | 8,880 | Analysis of primary data |
| Recurrent stroke hospitalization (per admission)       | 53,500                | 45,000-62,100                   | Gamma        | 4,380 | 17                       |
| Posthospitalization, mRS 0–2                           | 9,360                 | 7,800-10,900                    | Gamma        | 790   | Analysis of primary data |
| Posthospitalization, mRS 3-5                           | 9,200                 | 7,600-10,700                    | Gamma        | 780   | Analysis of primary data |
| <b><i>Direct non-medical costs (3 months cost)</i></b> |                       |                                 |              |       |                          |
| Patient treated with Alteplase and EVT                 | 23,200                | 21,800-24,600                   | Gamma        | 730   | Analysis of primary data |
| Patient treated with Alteplase                         | 25,300                | 23,700-26,800                   | Gamma        | 790   | Analysis of primary data |

|                                           | Base case value (THB) | Univariate sensitivity analysis | PSA          |          | Reference                |
|-------------------------------------------|-----------------------|---------------------------------|--------------|----------|--------------------------|
|                                           |                       |                                 | Distribution | SE       |                          |
| Patient treated with EVT                  | 26,200                | 24,500-27,800                   | Gamma        | 820      | Analysis of primary data |
| Patient treated with supportive care      | 28,700                | 26,900-30,500                   | Gamma        | 910      | Analysis of primary data |
| Patients with recurrent stroke            | 15,400                | 14,400-16,400                   | Gamma        | 500      | 17, 18                   |
| Posthospitalization (OPD visits), mRS 0–2 | 12,500                | 11,700-13,300                   | Gamma        | 400      | Analysis of primary data |
| Posthospitalization (OPD visits), mRS 3-5 | 10,800                | 10,200-11,500                   | Gamma        | 340      | Analysis of primary data |
| Discount rate for cost and outcome        | 3%                    | 0-4% (cost)<br>0-2% (outcome)   |              |          | 9                        |
| <b>Utility scores</b>                     |                       |                                 |              |          |                          |
| Independent                               | 0.86                  | 0.82-0.90                       | Beta         | 210-34   | Analysis of primary data |
| Disability                                | -0.23                 | -0.33-(-0.13)                   | Beta         | 51-13    | Analysis of primary data |
| Recurrent stroke                          | 0.34                  | 0.33-0.35                       | Beta         | 540-5685 | 15                       |
| Dead                                      | 0                     |                                 |              |          |                          |

|                                                                                                                                                                                                                                           | <b>Base case value (THB)</b> | <b>Univariate sensitivity analysis</b> | <b>PSA</b>          |           | <b>Reference</b> |
|-------------------------------------------------------------------------------------------------------------------------------------------------------------------------------------------------------------------------------------------|------------------------------|----------------------------------------|---------------------|-----------|------------------|
|                                                                                                                                                                                                                                           |                              |                                        | <b>Distribution</b> | <b>SE</b> |                  |
| EVT, endovascular treatment; mRS, modified Rankin Scale; THB, Thai baht; PSA, probabilistic sensitivity analysis; SE, standard error; NHSO, National Health Security Office                                                               |                              |                                        |                     |           |                  |
| *Includes all equipment for the EVT procedure: catheter, micro guidewire, micro catheter, guidewire, introducer short sheath, guiding catheter and intracranial stent (it is assumed that only 5% patients require an intracranial stent) |                              |                                        |                     |           |                  |
